# Supplementary material for: Electron-induced hydroamination of ethane as compared to ethene: implications for the reaction mechanism
Source: Royal Society of Chemistry journal article supplement (doi:10.1039/d3cp04840c), 2023-12-15
Supplement: d3cp04840c1.pdf [file d3cp04840c1.pdf]

Supplementary Information to

## Electron-induced hydroamination of ethane as compared to ethene: Implications for the reaction mechanism

Hannah Boeckers,<sup>a</sup> Martin Philipp Mues,<sup>a,b</sup> Jan Hendrik Bredehöft<sup>a</sup> and Petra Swiderek<sup>\*a</sup>

<sup>a</sup> Institute for Applied and Physical Chemistry (IAPC), Fachbereich 2 (Chemie/Biologie), University of Bremen, Leobener Str. 5 (NW2), 28359 Bremen, Germany

<sup>b</sup> Paderborn University, Institute for Photonic Quantum Systems (PhoQS), Warburger Str. 100, 33098 Paderborn, Germany

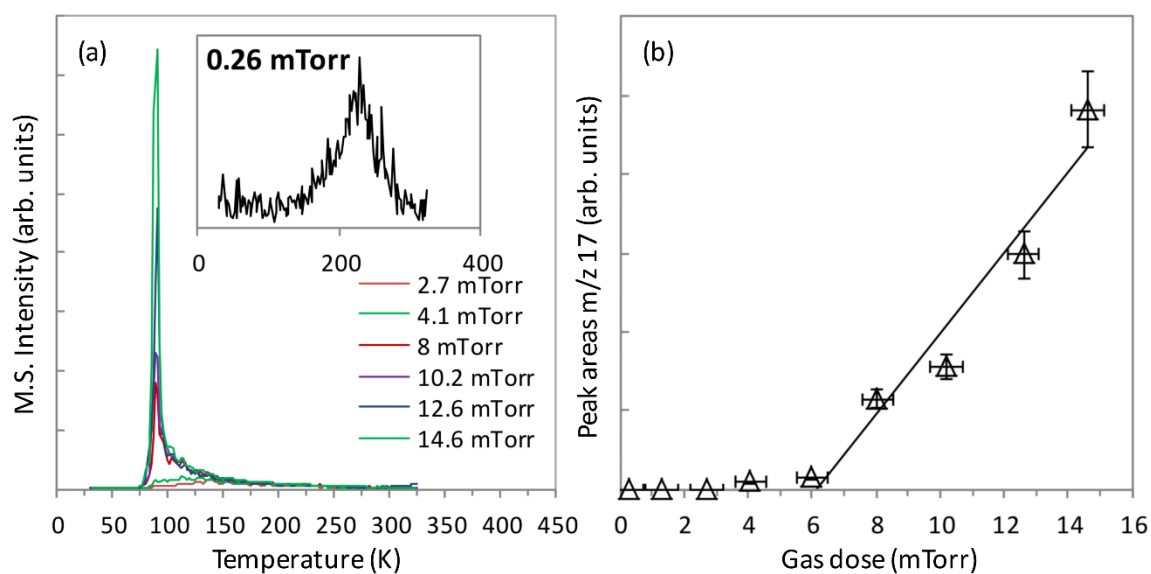

**Figure S1.** (a) TDS curves obtained for m/z 17 after leaking varying amounts of NH<sub>3</sub> onto the Ta substrate. The gas dose is stated as pressure drop in the gas handing manifold in units of mTorr. (b) Areas of the multilayer desorption peaks ascribed to NH<sub>3</sub> within the m/z 17 TDS curves as function of gas dose obtained by fitting the peaks with a gaussian function [1].

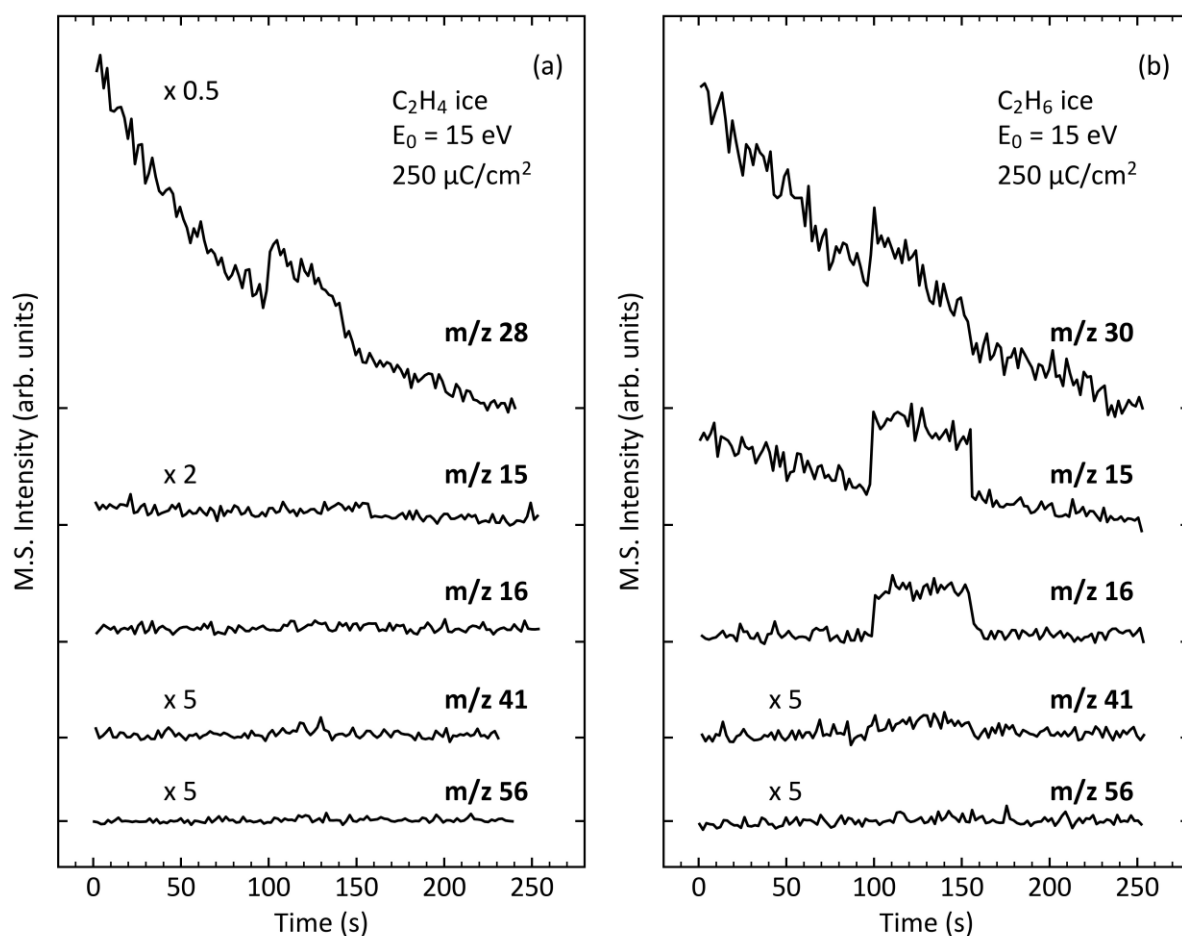

**Figure S2.** ESD monitored during an electron exposure of  $250 \mu\text{C}/\text{cm}^2$  at  $E_0 = 15 \text{ eV}$  from (a)  $\text{C}_2\text{H}_4$  and (b)  $\text{C}_2\text{H}_6$  ice with an estimated thickness of 10 monolayers. The abrupt increase of the intensity and the sudden decay mark the start and the end of irradiation. The exponential decay of the baseline in the topmost curves relates to the decay of the background pressure of the reactants after leaking into the UHV chamber. The parent signals of  $\text{C}_2\text{H}_4$  ( $m/z$  28) and  $\text{C}_2\text{H}_6$  ( $m/z$  30) give evidence of some molecular desorption from the ice.  $m/z$  28 is also the base peak in the mass spectrum (MS) of  $\text{C}_2\text{H}_6$  while  $m/z$  30 appears only with relative intensity of roughly 30% [2].  $m/z$  15 appears as fragment in the mass spectrum of  $\text{C}_2\text{H}_6$ . However, the  $m/z$  16 signal points to electron-induced production of  $\text{CH}_4$  from  $\text{C}_2\text{H}_6$  ice.  $m/z$  41 and  $m/z$  56 are characteristic MS signals of  $\text{C}_4$  hydrocarbons (see Table S1). Only  $m/z$  41 carries very small intensity in ESD from  $\text{C}_2\text{H}_6$  ice indicating that desorption of  $\text{C}_4$  products is negligible in line with the lower probability of larger products to desorb and their low abundance after the applied low irradiation doses.

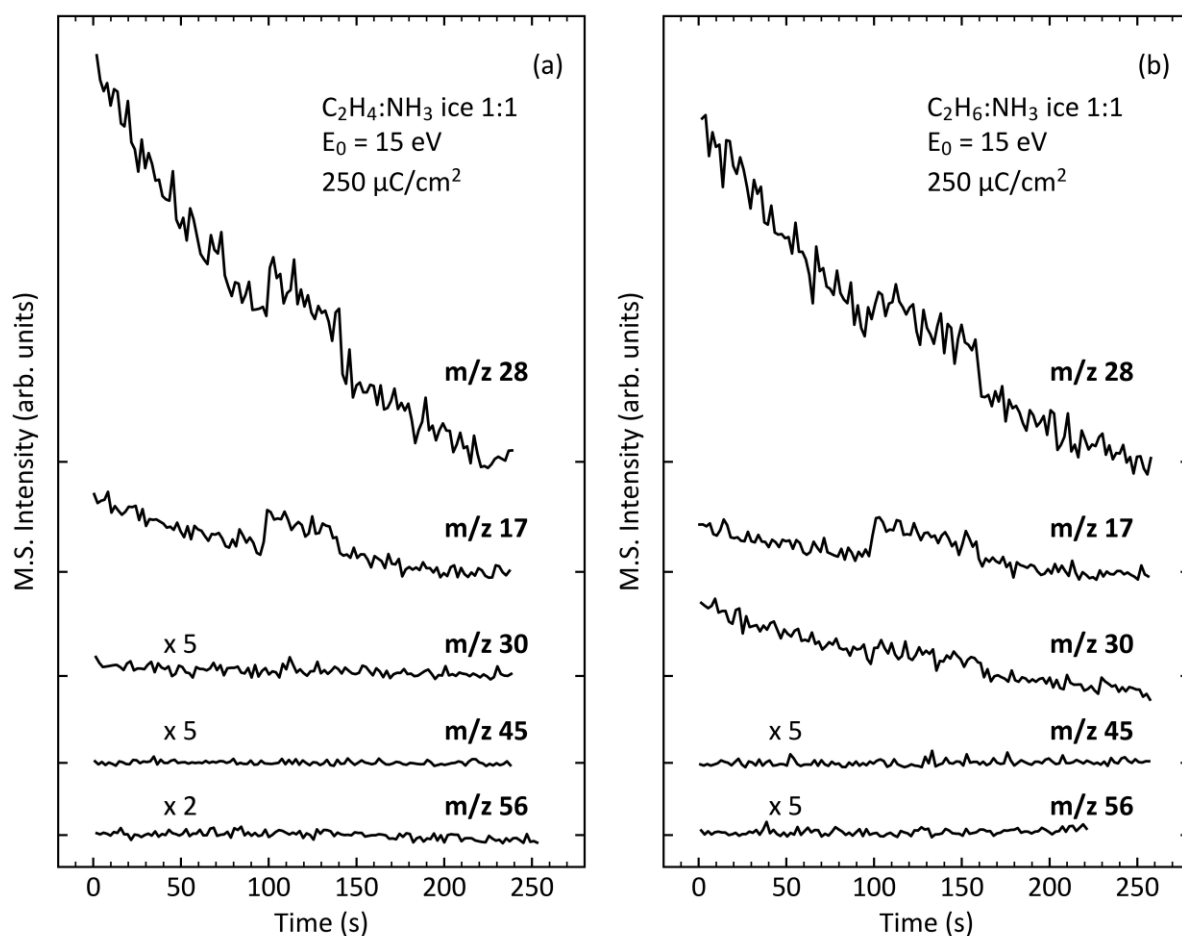

**Figure S3.** ESD monitored during an electron exposure of  $250 \mu C/cm^2$  at  $E_0 = 15$  eV from (a)  $C_2H_4:NH_3$  and (b)  $C_2H_6:NH_3$  ice with an estimated thickness of 10 monolayers. The abrupt increase of the intensity and the sudden decay mark the start and the end of irradiation. The exponential decay of the baseline in the topmost curves relates to the decay of the background pressure of the reactants after leaking into the UHV chamber. The  $m/z$  28 signal can be ascribed to the base signals of  $C_2H_4$  and  $C_2H_6$  but also to  $N_2$  formed as a consequence of electron-induced dissociation of  $NH_3$  [3].  $m/z$  17 reveals ESD of  $NH_3$ . The parent signal of  $C_2H_6$  ( $m/z$  30) relates to minor molecular desorption of  $C_2H_6$ .  $m/z$  45 is the parent signal of ethylamine and  $m/z$  56 is a characteristic MS signal of C4 hydrocarbons (see Table S1). Both signals do not show evidence for desorption in line with the lower probability of larger products to desorb and their low abundance after the applied low irradiation doses.

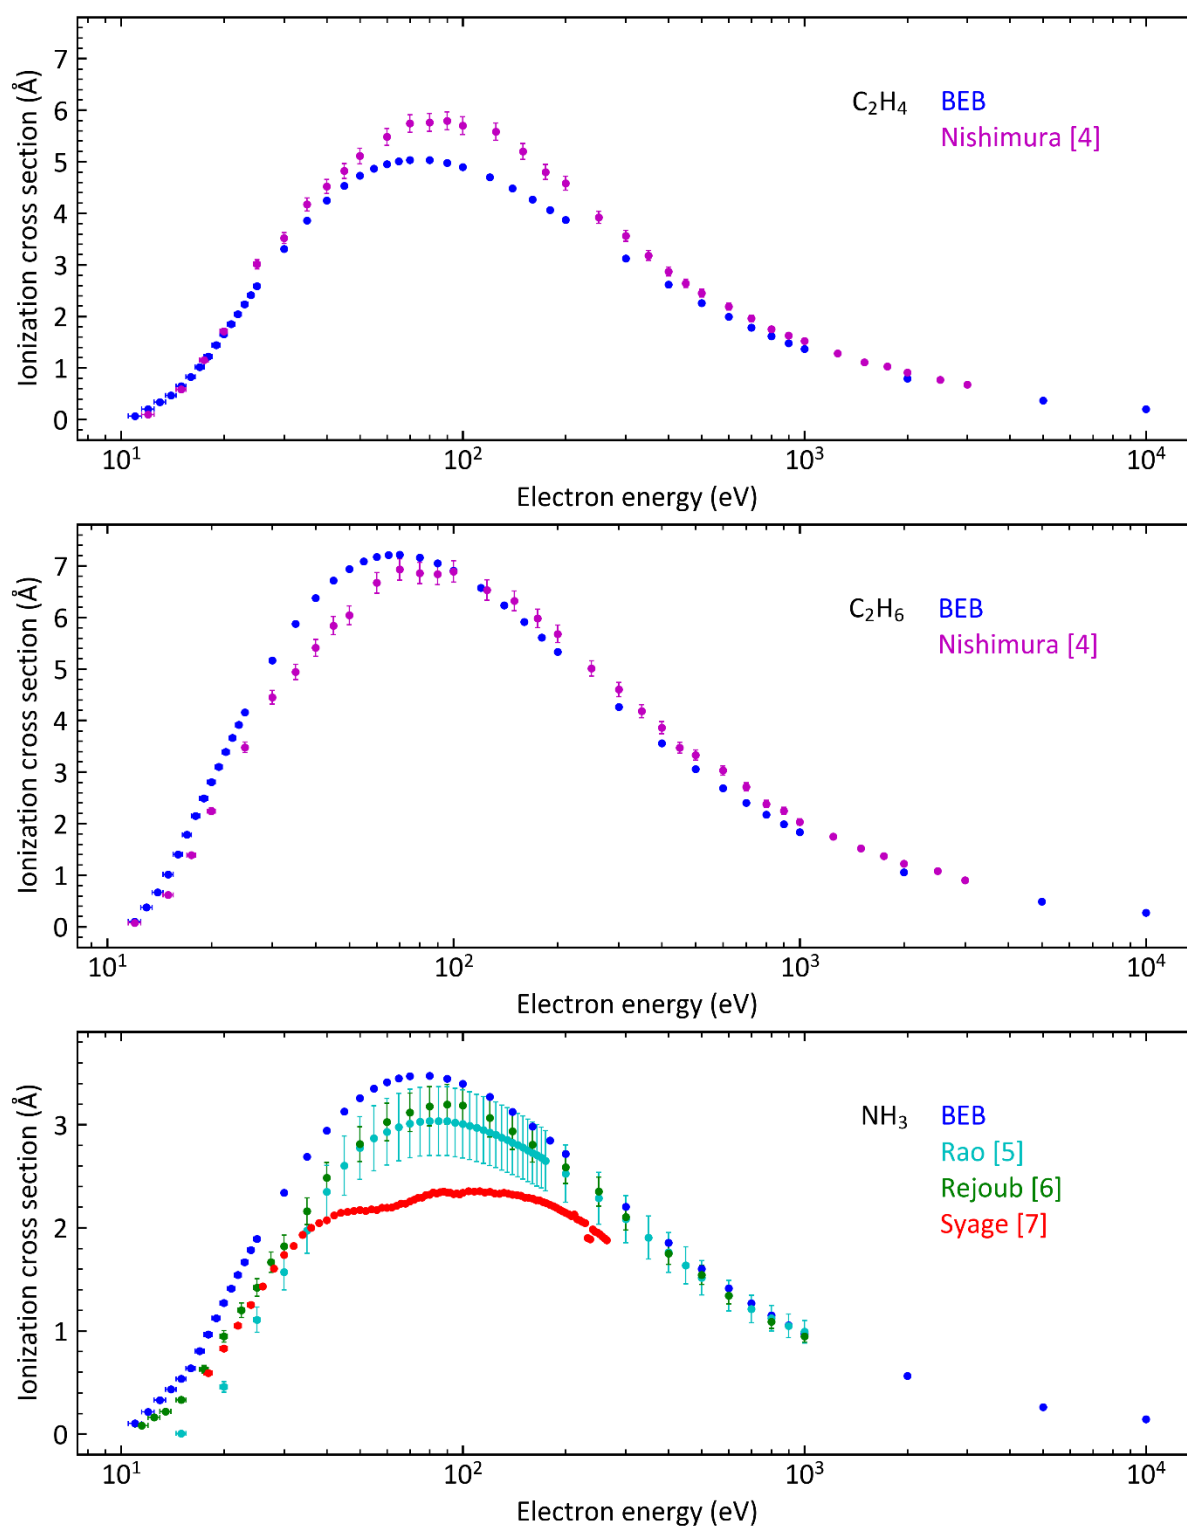

**Figure S4.** Total electron ionization cross sections (TICS) for C<sub>2</sub>H<sub>4</sub>, C<sub>2</sub>H<sub>6</sub>, and NH<sub>3</sub> calculated in the present work (BEB, blue) and comparison to experimental data [4-7]. Note that an estimate of the experimental errors of the data was not provided by Syage [7].

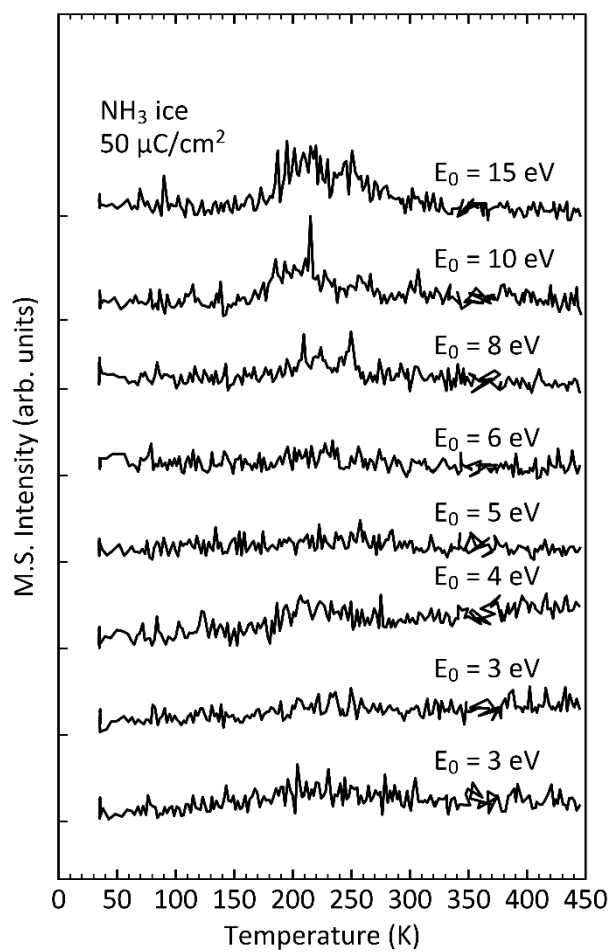

**Figure S5.** TDS curves obtained for  $m/z$  32 from  $\text{NH}_3$  ice with an estimated thickness of 9 monolayers after electron exposure of  $50 \mu\text{C}/\text{cm}^2$  at the electron energies stated in the plot.

**Table S1.** MS intensities for C6 hydrocarbons [2].

| C6 hydrocarbon                         | MS intensities at m/z |     |    |     |     |    |
|----------------------------------------|-----------------------|-----|----|-----|-----|----|
|                                        | 58                    | 56  | 54 | 43  | 41  | 39 |
| C <sub>6</sub> H <sub>14</sub>         |                       |     |    |     |     |    |
| n-hexane                               | 4                     | 45  | <1 | 81  | 70  | 20 |
| 2-methylpentane<br>(isohexane)         | <1                    | 4   | <1 | 100 | 29  | 13 |
| 3-methylpentane                        | 4                     | 77  | <1 | 25  | 53  | 9  |
| 2,2-dimethylbutane<br>(neohexane)      | 5                     | 28  | <1 | 100 | 49  | 14 |
| 2,3-dimethylbutane<br>(diisopropyl)    |                       | 2   | <1 | 100 | 45  | 20 |
| C <sub>6</sub> H <sub>12</sub>         |                       |     |    |     |     |    |
| 1-n-hexene                             | <1                    | 100 | 5  | 59  | 95  | 31 |
| 2-hexene                               |                       | 27  | 7  | 14  | 42  | 22 |
| 2-n-hexene (E)                         | <1                    | 23  | 7  | 12  | 37  | 19 |
| 2-n-hexene (Z)                         | <1                    | 25  | 8  | 14  | 50  | 38 |
| 3-n-hexene (E)                         | <1                    | 28  | 7  | 17  | 81  | 38 |
| 3-n-hexene (Z)                         |                       | 27  | 6  | 14  | 66  | 24 |
| 2-methyl-1-pentene                     | <1                    | 100 | 4  | 10  | 89  | 52 |
| 3-methyl-1-pentene                     |                       | 44  | 11 | 6   | 75  | 43 |
| 4-methyl-1-pentene<br>(isobutylethene) |                       | 50  | 1  | 100 | 68  | 20 |
| 2-methyl-2-pentene                     | <1                    | 15  | 2  | 8   | 100 | 19 |
| 3-methyl-2-pentene                     |                       | 22  | 4  | 8   | 100 | 20 |
| 3-methyl-2-pentene (E)                 | <1                    | 21  | 5  | 8   | 100 | 28 |
| 3-methyl-2-pentene (Z)                 |                       | 22  | 6  | 6   | 100 | 34 |
| 4-methyl-2-pentene                     |                       | 8   | 1  | 7   | 100 | 19 |
| 4-methyl-2-pentene (E)                 | <1                    | 7   | 2  | 7   | 100 | 28 |
| 4-methyl-2-pentene (Z)                 |                       | 7   | 2  | 6   | 100 | 33 |
| 3-methylene-pentane                    | <1                    | 31  | 8  | 10  | 100 | 39 |
| 2,3-dimethyl-1-butene                  |                       | 7   | 1  | 7   | 100 | 17 |
| 2,3-dimethyl-2-butene                  |                       | 6   | 1  | 7   | 100 | 18 |
| 3,3-dimethyl-1-butene                  | <1                    | 7   | 1  | 4   | 83  | 14 |

**Table S1.** continued.

| C <sub>6</sub> H <sub>10</sub> |                        |    |    |    |     |    |
|--------------------------------|------------------------|----|----|----|-----|----|
| 1,3-hexadiene (E)              | No NIST data available |    |    |    |     |    |
| 1,3-hexadiene (Z)              | No NIST data available |    |    |    |     |    |
| 1,4-hexadiene                  |                        | 2  | 22 | 1  | 51  | 56 |
| 1,4-hexadiene (E)              |                        | 1  | 18 |    | 40  | 46 |
| 1,4-hexadiene (Z)              |                        |    | 17 | 9  | 40  | 43 |
| 1,5-hexadiene                  |                        | <1 | 59 | <1 | 100 | 52 |
| 2,4-hexadiene                  |                        | 3  | 17 | 3  | 33  | 24 |
| 2,4-hexadiene (E,E)            |                        | 1  | 17 | <1 | 36  | 41 |
| 2,4-hexadiene (E,Z)            |                        | 1  | 17 | <1 | 35  | 29 |
| 2,4-hexadiene (Z,Z)            |                        |    | 15 |    | 32  | 38 |
| 2-methyl-1,3-pentadiene        |                        | 2  | 17 | 3  | 55  | 61 |
| 2-methyl-1,3-pentadiene (E)    |                        | 2  | 12 |    | 35  | 41 |
| 2-methyl-1,3-pentadiene (Z)    | No NIST data available |    |    |    |     |    |
| 3-methyl-1,3-pentadiene (E)    |                        | 1  | 13 | 1  | 34  | 38 |
| 3-methyl-1,3-pentadiene (Z)    |                        |    | 1  | 12 | 2   | 35 |
| 4-methyl-1,3-pentadiene        | <1                     | 2  | 14 | 3  | 42  | 30 |
| 2-methyl-1,4-pentadiene        |                        | 2  | 11 | 1  | 41  | 52 |
| 3-methyl-1,4-pentadiene        |                        | 1  | 12 | 1  | 33  | 24 |
| 2,3-dimethyl-1,3-butadiene     |                        | 2  | 32 | 4  | 58  | 57 |
| 2-ethyl-1,3-butadiene          |                        | 7  | 23 | 2  | 50  | 49 |
| 1-hexyne                       |                        | 4  | 26 | 42 | 60  | 28 |
| 2-hexyne                       |                        | 1  | 36 | 2  | 55  | 62 |
| 3-hexyne                       |                        | 2  | 22 | 2  | 88  | 69 |
| 3-methyl-1-pentyne             |                        | 4  | 19 | 1  | 36  | 45 |
| 4-methyl-1-pentyne             | <1                     | 2  | 12 | 79 | 75  | 33 |
| 4-methyl-2-pentyne             |                        | 1  | 9  | 2  | 93  | 61 |
| 3,3-dimethyl-1-butyne          |                        |    | 3  |    | 43  | 31 |

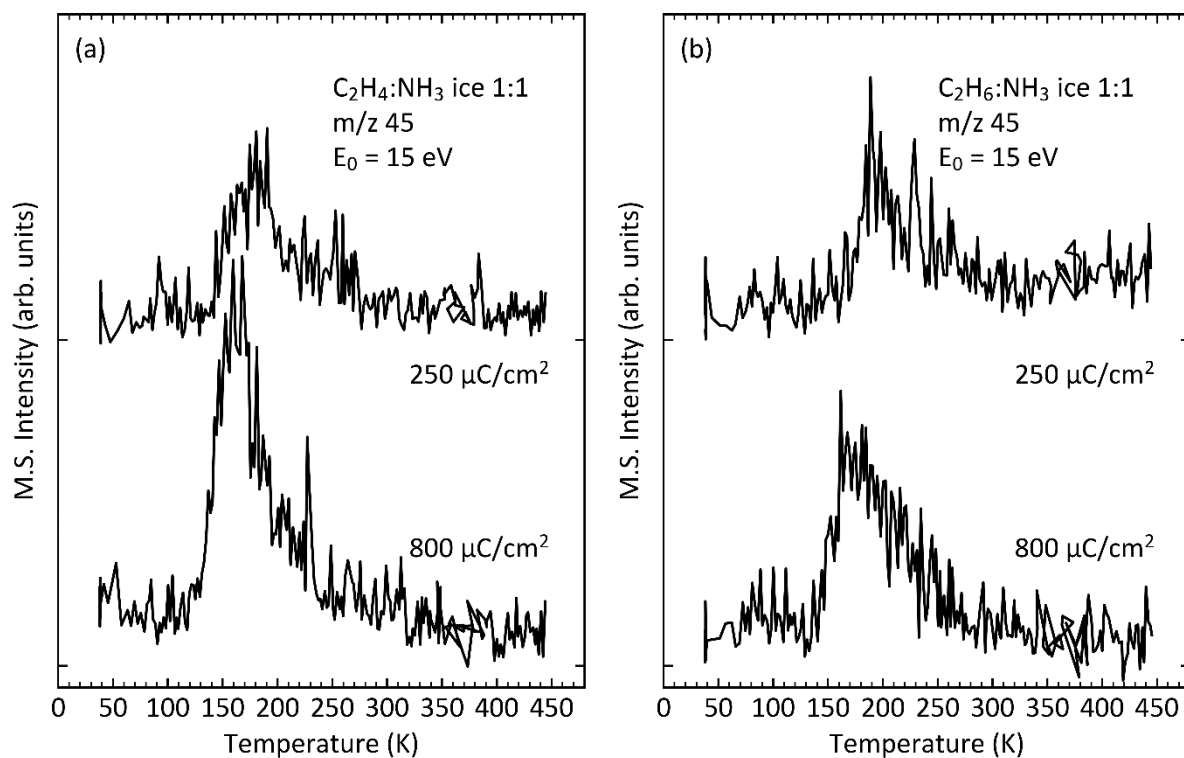

**Figure S6.** Thermal desorption spectra obtained for  $m/z$  45 from  $C_2H_4:NH_3$  (a) and  $C_2H_6:NH_3$  (b) ices with an estimated thickness of 12 monolayers after an electron exposure of  $250 \mu C/cm^2$  (top) and  $800 \mu C/cm^2$  (bottom) at  $E_0 = 15 eV$ . The vertical axes in both plots are shown with identical magnification with ticks indicating zero intensity for each curve.



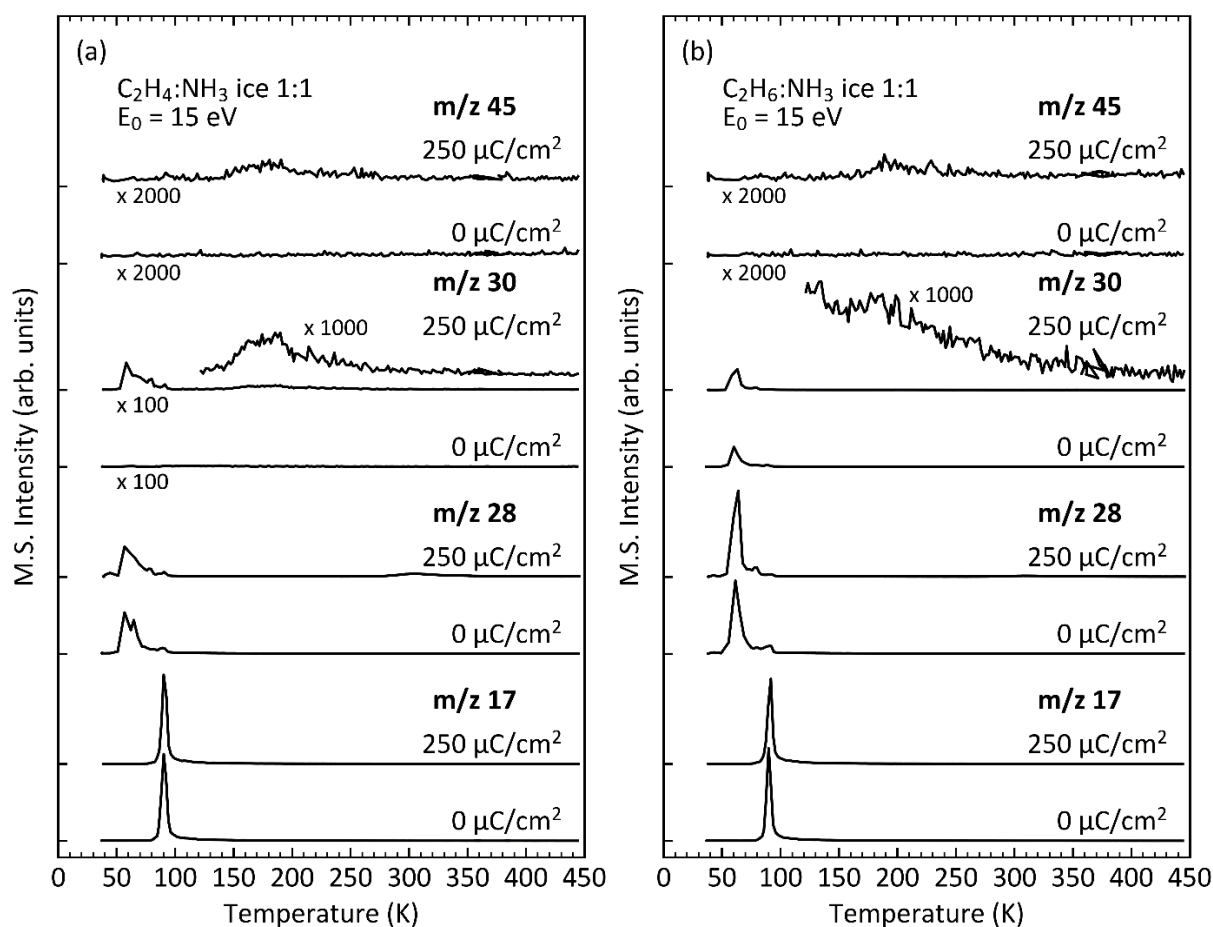

**Figure S7.** Thermal desorption spectra obtained for m/z 30 (base peak of ethylamine) and m/z 45 (parent signal of ethylamine) as well as m/z 28 (base peak ethane and ethene) and m/z 17 (parent signal NH<sub>3</sub>) from (a) C<sub>2</sub>H<sub>4</sub>:NH<sub>3</sub> and (b) C<sub>2</sub>H<sub>6</sub>:NH<sub>3</sub> ices (1:1) with an estimated thickness of 12 monolayers without (denoted as 0 μC/cm<sup>2</sup>) and after an electron exposure of 250 μC/cm<sup>2</sup> at E<sub>0</sub> = 15 eV. Formation of ethylamine is deduced from the appearance of a desorption signal between 140 K and 200 K after exposure. The vertical axes in both plots are shown with identical magnification with ticks indicating zero intensity for each curve.

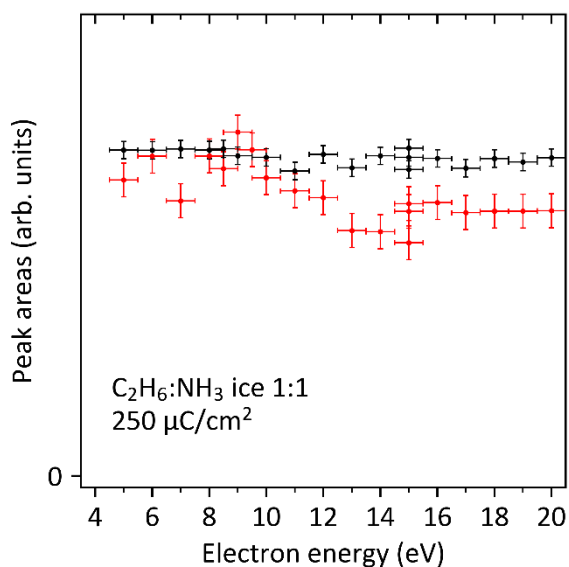

**Figure S8.** Remaining amounts of C<sub>2</sub>H<sub>6</sub> and NH<sub>3</sub> in C<sub>2</sub>H<sub>6</sub>:NH<sub>3</sub> ices (1:1) with an estimated thickness of 12 monolayers as function of E<sub>0</sub> after an electron exposure of 250 μC/cm<sup>2</sup>. Red symbols represent desorption peak areas derived from TDS curves recorded at m/z 30 which are ascribed to C<sub>2</sub>H<sub>6</sub>, black symbols represent NH<sub>3</sub> desorption peaks monitored at m/z 17.

## References

- [1] Figures adapted with permission from Master Thesis Fabian Schmidt (University of Bremen, 2016).
- [2] Stein, S. E. Mass Spectra. In NIST Chemistry WebBook; NIST Standard Reference Database Number 69; Linstrom, P. J., Mallard, W. G., Eds.; National Institute of Standards and Technology: Gaithersburg, MD; <http://webbook.nist.gov> (accessed 2023-09-11).
- [3] E. Böhler, J. H. Bredehöft and P. Swiderek, *J. Phys. Chem. C*, 2014, **118**, 6922-6933. <https://doi.org/10.1021/jp501192v>
- [4] H. Nishimura and H. Tawara, *J. Phys. B: At. Mol. Opt. Phys.*, 1994, **27**, 2063-2074. DOI 10.1088/0953-4075/27/10/016
- [5] M. V. V. S. Rao and S. K. Srivastava, *J. Phys. B: At. Mol. Opt. Phys.* 1992, **25**, 2175-2187. DOI 10.1088/0953-4075/25/9/021
- [6] R. Rejoub, B.G. Lindsay and R.F. Stebbings, *J. Chem. Phys.* 2001, **115**, 5053-5058. <https://doi.org/10.1063/1.1394748>
- [7] J.A. Syage, *Aerospace Report No. TR-94(4231)-3*, 1994. <https://apps.dtic.mil/sti/pdfs/ADA281248.pdf>
